# Supplementary material
Source: Springer Nature journal article supplement (https://www.springermedizin.de/resource/supplementary/12881_2012_1175_MOESM1_ESM.pdf/9452056)
Supplement: MOESM1 [file 9452056]

**Table S1:** Microsatellite markers and their respective primer sequences used for replication of previously reported linkage regions.

| Marker Name                | Labelled Primer Sequence (5' to 3') | Unlabelled Primer Sequence (5' to 3') | Het <sup>a</sup> | N <sup>b</sup> Alleles <sup>b</sup> |
|----------------------------|-------------------------------------|---------------------------------------|------------------|-------------------------------------|
| <b>Chromosome 3p25.3</b>   |                                     |                                       |                  |                                     |
| D3S1259 <sup>c</sup>       | GCTGGACTATATTTGAAACTCAT             | TTTCAGTGAGCCAAGATCGT                  | 0.83             | 14                                  |
| D3S1263                    | CTGTTGACCCATTGATACCC                | TAAAATCACAGCAGGGGTTTC                 | 0.86             | 17                                  |
| D3S1304                    | TTCGCTCTTTGATAGGC                   | ATTCATTTGTAATTTACTAGCAG               | 0.79             | 13                                  |
| D3S1597                    | AGTACAAATACACACAAATGTCTC            | GCAAATCGTTCATTGCT                     | 0.80             | 10                                  |
| D3S3691                    | TCTCAGCAATAGCAAACATCAGG             | TTGAAACCAGGGTGACAAATACATC             | 0.67             | 7                                   |
| <b>Chromosome 10q22.3</b>  |                                     |                                       |                  |                                     |
| D10S1677                   | ACTGCTCAGCATATTTTATGGC              | AGTTCATGGCTCCCTCA                     | 0.70             | 8                                   |
| D10S1730                   | GTGCAGCCACTGTTGAGAG                 | AAGTTTGAGAACCCTGGTCTATC               | 0.83             | 14                                  |
| D10S201                    | AGCTCATGGGATGGAAGCAT                | AGCTAAAAGGCTGCTGGAGA                  | 0.82             | 14                                  |
| D10S206                    | CCAAAACGTGGTCACAGATA                | GGATCCATGAAAATGCACCT                  | 0.56             | 8                                   |
| <b>Chromosome 10q26.3</b>  |                                     |                                       |                  |                                     |
| D10S1655                   | TGCCAGACTCCATGATGGTATGAAC           | TAACAAACATCTGAGCACAGCCCC              | 0.67             | 9                                   |
| D10S169                    | GATCTGTGACTGCCTTCCT                 | AAGAGGAGGAGTCCATTCAG                  | 0.73             | 10                                  |
| D10S1770                   | CATGAGATTTGAGTGGGG                  | AACAGGCTGTGGCCTC                      | 0.82             | 12                                  |
| D10S212 <sup>c</sup>       | GAAGTAAAGCAAGTTCTATCCACG            | TCTGTGTACGTTGAAAATCCC                 | 0.71             | 7                                   |
| D10S1711                   | CTATGATGCTGAGGGCAGTG                | ATGCTACCATGCCTGGCTAC                  | 0.70             | 7                                   |
| <b>Chromosome 17q12</b>    |                                     |                                       |                  |                                     |
| D17S1293                   | TGGAGGCTAGGAGTTTTCT                 | GGAGGCAGTGAGTTGTGATT                  | 0.83             | 11                                  |
| D17S927                    | TGTCTGACATGACACCCCT                 | TCCAACCTGAAGGCCAGT                    | 0.72             | 8                                   |
| D17S933                    | ACTCACTGGGGTCCTGG                   | TGTGGTTTCCTTATAGACTGTAGA              | 0.82             | 9                                   |
| D17S946                    | ACAGTCTATCAAGCAGAAAAATCCT           | TGCCGTGCCAGAGAGA                      | 0.80             | 10                                  |
| <b>Chromosome 19q13.43</b> |                                     |                                       |                  |                                     |
| D19S210                    | TCACACTCACTGGTCTCTCA                | GGTGTGCCTGTGTGTAAG                    | 0.73             | 7                                   |
| D19S214 <sup>c</sup>       | AGTCACAATGGAGACACATACATAC           | CAACTGGCTTTATCCCACTC                  | 0.63             | 14                                  |
| D19S254                    | TTCTGAGCACAACCAATCCT                | GACTCCGTATTAATAAAAAAAAAAG             | 0.77             | 11                                  |
| D19S572                    | ATTTGGGTGTGCTGACACG                 | GGCCACATCCTATCCCC                     | 0.80             | 11                                  |
| D19S887                    | TATCCAATGCCACAGAAAA                 | AAGGTTTGCTTGTGGGT                     | 0.74             | 9                                   |

<sup>a</sup> Heterozygosity; <sup>b</sup> Number of alleles seen in WAFSOM cohort; <sup>c</sup> Markers with significant linkage in the GWLS; reported by Daly *et al.* [6]

**Table S2:** Forward and reverse primer sequences for qualitative RT-PCR expression of four chromosome 10 candidate genes.

| <b>Gene</b>    | <b>Forward Primer Sequence (5' to 3')</b> | <b>Reverse Primer Sequence (5' to 3')</b> |
|----------------|-------------------------------------------|-------------------------------------------|
| <i>ADAM12</i>  | AGGAATTCTGGTGACCATCC                      | TCGGTGGGTAGGAATCTGG                       |
| <i>DOCK12</i>  | CTGGTGGTTAGAGATGAAGATGG                   | TGATGAATTTGGACTCCACAGG                    |
| <i>TCERG1L</i> | AAATTGCTGCTAGCCAAAGAAG                    | GTCCGTCTCCACCGTGAC                        |
| <i>PPP2R2D</i> | GCACCTTTCAAAGTCATGAACC                    | CTCCATCTTCGTCTTTCAGG                      |

**Table S3.** Results for SNPs  $P < 10^{-3}$  in the Raine Study across the region of Chromosome 10 from 127Mb to qter.

| CHR | GENE    | SNP        | Effect Allele | Allele Freq | POSITION  | PCA                   |                  | CONSEQUENCE |
|-----|---------|------------|---------------|-------------|-----------|-----------------------|------------------|-------------|
|     |         |            |               |             |           | P-value               | OR (95% CI)      |             |
| 10  | ADAM12  | rs7902734  | A             | 0.35        | 127942891 | $8.04 \times 10^{-4}$ | 1.47 (1.17-1.85) | INTRONIC    |
| 10  | DOCK1   | rs1538785  | C             | 0.90        | 128694878 | $2.33 \times 10^{-4}$ | 0.53 (0.37-0.74) | INTRONIC    |
| 10  | DOCK1   | rs4751179  | A             | 0.90        | 128699635 | $3.88 \times 10^{-4}$ | 0.53 (0.38-0.75) | INTRONIC    |
| 10  | DOCK1   | rs7068941  | A             | 0.10        | 128718078 | $1.96 \times 10^{-4}$ | 1.92 (1.36-2.71) | INTRONIC    |
| 10  | DOCK1   | rs7079472  | C             | 0.91        | 128721593 | $2.03 \times 10^{-4}$ | 0.52 (0.37-0.73) | INTRONIC    |
| 10  | DOCK1   | rs2185404  | A             | 0.09        | 128723423 | $2.04 \times 10^{-4}$ | 1.92 (1.36-2.72) | INTRONIC    |
| 10  | DOCK1   | rs7085407  | C             | 0.91        | 128726204 | $2.10 \times 10^{-4}$ | 0.52 (0.37-0.73) | INTRONIC    |
| 10  | DOCK1   | rs880272   | A             | 0.09        | 128730832 | $2.14 \times 10^{-4}$ | 1.92 (1.36-2.72) | INTRONIC    |
| 10  | DOCK1   | rs1538788  | A             | 0.10        | 128735637 | $2.30 \times 10^{-4}$ | 1.91 (1.35-2.7)  | INTRONIC    |
| 10  | DOCK1   | rs7092964  | C             | 0.90        | 128737210 | $1.04 \times 10^{-4}$ | 0.51 (0.37-0.72) | INTRONIC    |
| 10  | DOCK1   | rs9418726  | G             | 0.68        | 128742134 | $3.26 \times 10^{-4}$ | 0.66 (0.52-0.83) | INTRONIC    |
| 10  | DOCK1   | rs1953965  | A             | 0.10        | 128742319 | $2.68 \times 10^{-4}$ | 1.89 (1.34-2.67) | INTRONIC    |
| 10  | DOCK1   | rs7909186  | C             | 0.32        | 128742746 | $3.46 \times 10^{-4}$ | 1.52 (1.21-1.91) | INTRONIC    |
| 10  | DOCK1   | rs7923722  | C             | 0.90        | 128744069 | $2.97 \times 10^{-4}$ | 0.53 (0.38-0.75) | INTRONIC    |
| 10  | DOCK1   | rs1417153  | A             | 0.09        | 128746542 | $2.26 \times 10^{-4}$ | 1.92 (1.36-2.72) | INTRONIC    |
| 10  | DOCK1   | rs7918376  | C             | 0.90        | 128748249 | $2.92 \times 10^{-4}$ | 0.53 (0.38-0.75) | INTRONIC    |
| 10  | DOCK1   | rs4751519  | C             | 0.90        | 128748514 | $2.92 \times 10^{-4}$ | 0.53 (0.38-0.75) | INTRONIC    |
| 10  | DOCK1   | rs4751520  | C             | 0.10        | 128748549 | $2.87 \times 10^{-4}$ | 1.89 (1.34-2.66) | INTRONIC    |
| 10  | DOCK1   | rs4751533  | A             | 0.10        | 128751289 | $2.65 \times 10^{-4}$ | 1.9 (1.34-2.68)  | INTRONIC    |
| 10  | DOCK1   | rs9418822  | A             | 0.32        | 128752085 | $3.06 \times 10^{-4}$ | 1.52 (1.21-1.91) | INTRONIC    |
| 10  | DOCK1   | rs4635002  | A             | 0.10        | 128752669 | $2.21 \times 10^{-4}$ | 1.91 (1.36-2.69) | INTRONIC    |
| 10  | DOCK1   | rs6482987  | A             | 0.10        | 128753770 | $2.06 \times 10^{-4}$ | 1.92 (1.36-2.72) | INTRONIC    |
| 10  | DOCK1   | rs7917277  | C             | 0.90        | 128754664 | $1.38 \times 10^{-4}$ | 0.51 (0.36-0.72) | INTRONIC    |
| 10  | DOCK1   | rs9418829  | A             | 0.30        | 128755590 | $3.12 \times 10^{-4}$ | 1.55 (1.22-1.96) | INTRONIC    |
| 10  | DOCK1   | rs1417154  | A             | 0.10        | 128756210 | $1.18 \times 10^{-4}$ | 2 (1.4-2.84)     | INTRONIC    |
| 10  | DOCK1   | rs9418737  | A             | 0.10        | 128757840 | $9.21 \times 10^{-5}$ | 2.04 (1.43-2.91) | INTRONIC    |
| 10  | DOCK1   | rs9418832  | A             | 0.10        | 128757891 | $7.48 \times 10^{-5}$ | 2.06 (1.44-2.95) | INTRONIC    |
| 10  | DOCK1   | rs7091697  | A             | 0.56        | 128783565 | $1.71 \times 10^{-4}$ | 0.66 (0.53-0.82) | INTRONIC    |
| 10  | TCERG1L | rs2996081  | A             | 0.11        | 132860626 | $9.15 \times 10^{-4}$ | 0.49 (0.32-0.75) | INTRONIC    |
| 10  |         | rs12250300 | A             | 0.07        | 133183097 | $2.28 \times 10^{-5}$ | 2.34 (1.58-3.47) | INTERGENIC  |
| 10  |         | rs7087384  | A             | 0.07        | 133185799 | $2.28 \times 10^{-5}$ | 2.34 (1.58-3.46) | INTERGENIC  |
| 10  |         | rs7912988  | G             | 0.93        | 133203929 | $2.72 \times 10^{-5}$ | 0.43 (0.29-0.64) | INTERGENIC  |
| 10  |         | rs7914323  | C             | 0.93        | 133204205 | $2.05 \times 10^{-5}$ | 0.42 (0.28-0.63) | INTERGENIC  |
| 10  |         | rs7922424  | A             | 0.07        | 133206442 | $9.47 \times 10^{-6}$ | 2.49 (1.66-3.73) | INTERGENIC  |
| 10  |         | rs11813611 | C             | 0.90        | 133216884 | $8.09 \times 10^{-4}$ | 2 (1.33-3)       | INTERGENIC  |
| 10  |         | rs11018027 | A             | 0.10        | 133229112 | $6.78 \times 10^{-4}$ | 0.51 (0.34-0.75) | INTERGENIC  |
| 10  |         | rs10830030 | A             | 0.12        | 133229698 | $8.96 \times 10^{-4}$ | 0.53 (0.36-0.77) | INTERGENIC  |
| 10  |         | rs10765090 | C             | 0.13        | 133238729 | $8.57 \times 10^{-4}$ | 0.55 (0.38-0.78) | INTERGENIC  |

OR = odds ratio, 95% CI = 95% confidence intervals. Odds ratios are stated for the effect (disease-associated) allele.

**Table S4:** Raine Study results for the 10q26.3 region showing respective top SNPs for various genes/regions after adjusting for known environmental covariates using ProbABEL.

| CHR | GENE    | SNP       | Effect Allele | Allele Freq | POSITION  | PCA                   |                  | PCA + Daycare         |                  | PCA + Allergy         |                  |
|-----|---------|-----------|---------------|-------------|-----------|-----------------------|------------------|-----------------------|------------------|-----------------------|------------------|
|     |         |           |               |             |           | P-value               | OR (95% CI)      | P-value               | OR (95% CI)      | P-value               | OR (95% CI)      |
| 10  | ADAM12  | rs7902734 | A             | 0.34        | 127942891 | 8.04x10 <sup>-4</sup> | 1.47 (1.17-1.85) | 6.04x10 <sup>-4</sup> | 1.49 (1.19-1.87) | 6.93x10 <sup>-4</sup> | 1.48 (1.18-1.86) |
| 10  | DOCK1   | rs9418832 | A             | 0.10        | 128757891 | 7.48x10 <sup>-5</sup> | 2.06 (1.44-2.95) | 8.62x10 <sup>-5</sup> | 2.05 (1.43-2.94) | 1.07x10 <sup>-4</sup> | 2.04 (1.42-2.92) |
| 10  | TCERG1L | rs2996081 | C             | 0.89        | 132860626 | 9.15x10 <sup>-4</sup> | 2.04 (1.33-3.13) | 7.00x10 <sup>-4</sup> | 2.08 (1.37-3.23) | 9.84x10 <sup>-4</sup> | 2.04 (1.33-3.13) |
| 10  |         | rs7922424 | A             | 0.07        | 133206442 | 9.47x10 <sup>-6</sup> | 2.49 (1.66-3.73) | 1.55x10 <sup>-5</sup> | 2.45 (1.63-3.67) | 4.96x10 <sup>-6</sup> | 2.58 (1.72-3.88) |

| CHR | GENE    | SNP       | Effect Allele | Allele Freq | POSITION  | PCA + Other Milk      |                  | PCA + All Covariates  |                  | CONSEQUENCE |
|-----|---------|-----------|---------------|-------------|-----------|-----------------------|------------------|-----------------------|------------------|-------------|
|     |         |           |               |             |           | P-value               | OR (95% CI)      | P-value               | OR (95% CI)      |             |
| 10  | ADAM12  | rs7902734 | A             | 0.34        | 127942891 | 7.35x10 <sup>-4</sup> | 1.48 (1.18-1.86) | 5.55x10 <sup>-4</sup> | 1.50 (1.19-1.89) | INTRONIC    |
| 10  | DOCK1   | rs9418832 | A             | 0.10        | 128757891 | 2.82x10 <sup>-5</sup> | 2.17 (1.51-3.11) | 4.56x10 <sup>-5</sup> | 2.13 (1.48-3.07) | INTRONIC    |
| 10  | TCERG1L | rs2996081 | C             | 0.89        | 132860626 | 1.01x10 <sup>-3</sup> | 2.04 (1.33-3.13) | 9.07x10 <sup>-4</sup> | 2.04 (1.33-3.13) | INTRONIC    |
| 10  |         | rs7922424 | A             | 0.07        | 133206442 | 1.27x10 <sup>-5</sup> | 2.47 (1.65-3.72) | 1.10x10 <sup>-5</sup> | 2.52 (1.67-3.81) | INTERGENIC  |

Where OR = odds ratio, 95% CI = 95% confidence intervals. Odds ratios are stated for the effect (disease-associated) allele.

**Table S5:** Details of transcription factor binding sites for top SNPs across the *TCERG1L/PPP2R2D* gene region. A transcription factor is shown only when a change in allele adds or removes a particular transcription factor binding site.

| <b>Gene/SNP</b>         | <b>Allele</b> | <b>Program</b>          |                     |
|-------------------------|---------------|-------------------------|---------------------|
|                         |               | <b>ALIBABA2</b>         | <b>MatInspector</b> |
| Intergenic<br>rs7087384 | G             | C-Jun/CREBP1/CPE/C-EBPa | CREB/AP1R           |
|                         | A             | -                       | -                   |
| Intergenic<br>rs7914323 | C             | -                       | HTEN                |
|                         | T             | USF                     | -                   |
| Intergenic<br>rs7922424 | G             | USF                     | MYC/USF             |
|                         | A             | -                       | -                   |

N.B. Major allele listed first.
